# Supplementary material
Source: Research Square preprint supplement (doi:10.21203/rs.3.rs-8848413/v1)
Supplement: Supplementary file 1 [file 2a5e18f458e5883710f20a14.docx]

Supplemental Table: Comparison of Human Middle-Ear Models (2005–2025, including present study)

| **Study (First Author, Year)** | **Journal** | **Model Type** | **Frequency Range (Hz)** | **Fluid Coupling** | **Stapes Displacement at ~1 kHz / 90 dB SPL** | **Key Findings / Innovations** | **Validation Method** | **Main Limitations** |
| --- | --- | --- | --- | --- | --- | --- | --- | --- |
| **Present study (Ouzzine et al., 2025)** |  | FEM & FSI comparative (3 human models) | **4 – 4000** | Yes (cochlear load via FSI) | **≈ 0.08 – 0.1 µm (80–100 nm)** | Comparative analysis of three middle-ear models (simplified, FSI, anatomical) showing continuous mechanical behavior from infrasonic to audible range; identified slow amplitude modulation near 1 kHz consistent with resonance phenomena. | Internal validation by cross-model consistency; stapes amplitude within experimental range; methodology aligned with previous human FE data. | Short simulation time window (20 ms); simplified joint modeling; solver limitations |
| **Gan et al., 2006**(Gan et al., 2006) | *Medical Engineering & Physics* | FEM (FSI: ear canal & ME air) | 100 – 8000 | Yes (air cavities) | ≈ 0.05 – 0.1 µm | 3D FE model including ear canal & ME cavity; revealed uniform pressure at <1 kHz and standing-wave effects >2 kHz in canal. | Compared TM & stapes motion to human temporal-bone LDV data – close agreement. | Simplified cochlea; linear materials; no mastoid air-cell model. |
| **Gan et al., 2007**(Gan et al., 2007) | *Annals of Biomedical Engineering* | FEM (FSI: full ear) | 100 – 10 000 | Yes (air + cochlear fluid) | ≈ 0.1 µm | First full-ear FE coupling (canal → cochlea). Predicted BM motion from acoustic input. | Matched TM, stapes, and BM responses to human cadaver data. | Simplified cochlear partition; small-signal linear model. |
| **De Greef et al., 2017**(De Greef et al., 2014) | *Hearing Research* | FEM (3 anatomies) | 100 – 10 000 | No (structural; impedance load) | ≈ 0.05 µm (50 nm) | Showed inter-subject variability (~4–6 dB differences) despite identical parameters; identified key parameters (TM damping, cochlear impedance). | Validated against LDV data for umbo & stapes; responses within physiological range. | Linear model; impedance load only; limited sample (3 ears). |
| **Motallebzadeh et al., 2017**(Motallebzadeh et al., 2013) | *JARO* | FEM (FSI; newborn ear) | 100 – 10 000 | Yes (air + ME cavity) | ≈ 0.03 – 0.05 µm | First newborn ear model; explained low-frequency resonances in infant admittance (~0.5 kHz & 1.8 kHz). | Compared simulated admittance to in vivo infant tympanometry. | Simplified stapes/cochlear load; linear elasticity; inviscid air cavity. |
| **O’Connor et al., 2017**(O’Connor et al., 2017) | *JASA* | FEM (structural) | 100 – 8000 | No (acoustic BC) | ≈ 0.05 – 0.1 µm | Analyzed effect of TM material properties on transfer function; realistic TM damping needed to match data. | Compared FE transfer function to Puria & Goode experimental data; matched around 1 kHz. | No FSI; fixed joint & ligament parameters; linear elasticity. |
| **Ebrahimian et al., 2023**(Ebrahimian et al., 2023) | *Scientific Reports* | FEM (stochastic) | 100 – 10 000 | No (structural) | ≈ 0.08 – 0.09 µm | Introduced stochastic FE model to quantify variability; found >3× uncertainty amplification >2 kHz. | Baseline FE model validated vs experimental stapes motion (within 3 dB). | No fluid coupling; statistical distributions assumed; computationally intensive. |
| **Yu et al., 2022**(Yu et al., 2022) | *Scientific Reports* | FEM (FSI: full ear with cochlear fluid) | 13 – 10 000 | Yes (cochlear fluid) | ≈ 0.09 – 0.1 µm | Extended to infrasound (<20 Hz); modeled perilymph pressure & BM stress; introduced “Auditory Risk Unit.” | Compared predicted BM damage region (~4 kHz) with epidemiological data; matched transfer function to literature. | No active cochlear process; generic geometry; limited validation for damage metric. |
| **Golabbakhsh et al., 2023**(Golabbakhsh et al., 2023) | *JARO* | FEM (structural; OCT validated) | 500 – 2000 | No (structural only) | ≈ 0.04 – 0.07 µm (40–70 nm) | First use of OCT data for subject-specific FE modeling; reproduced TM & stapes vibration maps. | Directly validated by OCT vibrometry on same ears. | Partial soft-tissue segmentation; 2 kHz deviation; cadaver-based. |
|  |  |  |  |  |  |  |  |  |
